# Supplementary material for: Clinical Outcomes Following Re-Operations for Intracranial Meningioma
Source: Cancers (Basel). 2021 Sep 24;13(19):4792. doi: 10.3390/cancers13194792 (PMC8507983; doi:10.3390/cancers13194792)
Supplement: Supplementary file 1 [file cancers-13-04792-s001.zip › cancers-1374324-supplementary.pdf]

**Table S1.** Reliability analysis for tumour volumes at diagnosis. Intra- and Inter-rater ICC values are included and demonstrate agreeability between independent researchers. 95% confidence intervals for the values are included.

| <b>Inter- and Intra-rater Reliability Analysis</b> |                                |                                |
|----------------------------------------------------|--------------------------------|--------------------------------|
|                                                    | <b>Correlation Coefficient</b> | <b>95% Confidence Interval</b> |
| Inter-Class                                        | 0.93                           | 0.86-0.97                      |
| Intra-Class                                        | 0.97                           | 0.93-0.98                      |

**Table S2.** Definitions of Landriel-Ibañez classification of post-neurosurgical complications [14].

| <b>Landriel-Ibañez Classification Grades</b> |                                                                                                       |
|----------------------------------------------|-------------------------------------------------------------------------------------------------------|
| <b>Grade 1</b>                               | Non-life-threatening deviation from normal post-op course, not requiring invasive treatment           |
| <b>Grade 1a</b>                              | Complication requiring no drug treatment                                                              |
| <b>Grade 1b</b>                              | Complication requiring drug treatment                                                                 |
| <b>Grade 2</b>                               | Complication requiring invasive treatment such as surgical, endoscopic, or endovascular interventions |
| <b>Grade 2a</b>                              | Complication requiring intervention without general anaesthesia (Local anaesthetic)                   |
| <b>Grade 2b</b>                              | Complication requiring intervention with general anaesthetic                                          |
| <b>Grade 3</b>                               | Life-threatening complications requiring management in ICU                                            |
| <b>Grade 3a</b>                              | Complication involving single organ failure                                                           |
| <b>Grade 3b</b>                              | Complication involving multiple organ failure                                                         |
| <b>Grade 4</b>                               | Complication resulting in death                                                                       |

**Table S3.** Definitions of Clavien-Dindo classification of post-surgical complications [15].

| <b>Clavien-Dindo Classification</b> |                                                                                                                                                                                                                                                                                                                                                            |
|-------------------------------------|------------------------------------------------------------------------------------------------------------------------------------------------------------------------------------------------------------------------------------------------------------------------------------------------------------------------------------------------------------|
| <b>Grade 1</b>                      | Any deviation from the normal postoperative course without the need for pharmacological treatment or surgical, endoscopic, and radiological interventions<br>Allowed therapeutic regimens are: drugs as antiemetics, antipyretics, analgesics, diuretics, electrolytes, and physiotherapy. This grade also includes wound infections opened at the bedside |
| <b>Grade 2</b>                      | Requiring pharmacological treatment with drugs other than such allowed for grade I complications<br>Blood transfusions and total parenteral nutrition are also included                                                                                                                                                                                    |
| <b>Grade 3</b>                      | Requiring surgical, endoscopic or radiological intervention                                                                                                                                                                                                                                                                                                |
| <b>Grade 3a</b>                     | Intervention not under general anaesthesia                                                                                                                                                                                                                                                                                                                 |
| <b>Grade 3b</b>                     | Intervention under general anaesthesia                                                                                                                                                                                                                                                                                                                     |
| <b>Grade 4</b>                      | Life-threatening complication (including CNS complications) requiring IC/ICU management                                                                                                                                                                                                                                                                    |
| <b>Grade 4a</b>                     | Single organ dysfunction (including dialysis)                                                                                                                                                                                                                                                                                                              |
| <b>Grade 4b</b>                     | Multiorgan dysfunction                                                                                                                                                                                                                                                                                                                                     |
| <b>Grade 5</b>                      | Death of a patient                                                                                                                                                                                                                                                                                                                                         |

**Table S4.** Showing univariate and multivariate analysis steps. Values highlighted in green are  $\leq 0.2$  for univariate, or  $\leq 0.05$  for multivariate analysis. ‡ Continuous variable. † Binary variable, reference category for these variables is always no. • Where multiple categories exist for a variable the lowest P value within the set has been included.

| Variable Name (Reference Category)                                      | Univariate P Value<br>( $\leq 0.2$ ) | Multivariate P Value<br>( $\leq 0.05$ ) |
|-------------------------------------------------------------------------|--------------------------------------|-----------------------------------------|
| Age at Re-Operation‡                                                    | 0.606                                |                                         |
| Sex (Female)                                                            | 0.902                                |                                         |
| Radiation Induced Meningioma†                                           | 0.999                                |                                         |
| ACCI at Diagnosis (ACCI 0)                                              | 0.691•                               |                                         |
| ICOM Classification (Convexity)                                         | 0.325•                               |                                         |
| Skull Base†                                                             | 0.629                                |                                         |
| Oedema†                                                                 | 0.341                                |                                         |
| Hyperintensity†                                                         | 0.703                                |                                         |
| Tumour Volume at Presentation‡                                          | 0.971                                |                                         |
| Simpson Grade at Initial Operation (Grade 1)                            | 0.337•                               |                                         |
| Residual Tumour Volume at Initial Operation‡                            | 0.873                                |                                         |
| WHO Grade at Initial Operation (Grade 1)                                | 0.228•                               |                                         |
| Worsened Performance Status Following Initial Operation†                | 0.999                                |                                         |
| Adjuvant Radiation After Initial Operation†                             | 0.999                                |                                         |
| Post-Operative Complication after Initial Operation†                    | 0.445                                |                                         |
| Pre-Operative Performance Status at Re-Operation (Performance Status 0) | 0.999•                               |                                         |
| Simpson Grade at Re-Operation (Grade 1)                                 | 0.487•                               |                                         |
| Adjuvant Radiation After Re-Operation†                                  | 0.309                                |                                         |
| WHO Grade at Re-Operation (Grade 1)                                     | 0.847•                               |                                         |
| Number of Complications After Re-Operation‡                             | 0.013                                | 0.029                                   |
| Time to First Recurrence‡                                               | 0.022                                | 0.044                                   |
| Volume at First Recurrence‡                                             | 0.475                                |                                         |
| Incidental at First Recurrence†                                         | 0.343                                |                                         |
| Headache at First Recurrence†                                           | 0.200                                | 0.437                                   |
| Seizure at First Recurrence†                                            | 1.0                                  |                                         |
| Limb Weakness at First Recurrence†                                      | 1.0                                  |                                         |
| Limb Sensory Change at First Recurrence†                                | 0.554                                |                                         |
| Cranial Nerve Deficit at First Recurrence†                              | 0.707                                |                                         |
| Cognitive Deficit at First Recurrence†                                  | 1.0                                  |                                         |
| Psychiatric Manifestation at First Recurrence †                         | 1.0                                  |                                         |
